# Supplementary material for: Spoken Word Learning in Children With Developmental Language Disorder or Dyslexia
Source: PubMed Central journal article supplement (PMC8632516; doi:10.1044/2021_jslhr-20-00217), 2021-06-28
Supplement: JSLHR-64-2734-s001.pdf [file JSLHR-64-2734-s001.pdf]

### Supplemental Material S1

#### A. Descriptive statistics and group comparisons for subgrouping and descriptive assessments using SLI criteria.

| Subgrouping Assessment            | Group Scores           |                         |                         |                             | ANOVA Results |          |          |                       |                                                         |
|-----------------------------------|------------------------|-------------------------|-------------------------|-----------------------------|---------------|----------|----------|-----------------------|---------------------------------------------------------|
|                                   | TD<br>( <i>n</i> = 86) | SLI<br>( <i>n</i> = 47) | DYS<br>( <i>n</i> = 30) | SLI+DYS<br>( <i>n</i> = 60) | <i>df</i> (3, | <i>F</i> | <i>p</i> | <i>R</i> <sup>2</sup> | Group Comparison                                        |
| CELF-4<br><i>M</i> ( <i>SD</i> )  | 101.01<br>(6.99)       | 79.47<br>(5.13)         | 97.47<br>(5.67)         | 73.82<br>(8.68)             | 219           | 221.82   | < .001   | .752                  | TD = DYS > SLI > SLI+DYS                                |
| WRMT-3<br><i>M</i> ( <i>SD</i> )  | 101.23<br>(6.11)       | 101.53<br>(7.75)        | 80.23<br>(3.70)         | 74.82<br>(7.40)             | 219           | 258.69   | < .001   | .777                  | TD = SLI > DYS > SLI+DYS                                |
| TONI-4<br><i>M</i> ( <i>SD</i> )  | 106.73<br>(8.68)       | 103.57<br>(6.94)        | 102.30<br>(7.76)        | 96.92<br>(7.29)             | 219           | 18.62    | < .001   | .203                  | TD = SLI > SLI+DYS,<br>SLI = DYS,<br>TD > DYS > SLI+DYS |
| Descriptive Assessment            | TD <sup>a</sup>        | SLI                     | DYS                     | SLI+DYS <sup>b</sup>        | <i>df</i> (3, | <i>F</i> | <i>p</i> | <i>R</i> <sup>2</sup> | Group Comparison                                        |
| TOWRE-2<br><i>M</i> ( <i>SD</i> ) | 102.15<br>(9.77)       | 100.77<br>(9.76)        | 79.00<br>(8.17)         | 74.93<br>(12.03)            | 219           | 111.09   | < .001   | .603                  | TD = SLI ><br>DYS = SLI+DYS                             |
| CTOPP-2<br><i>M</i> ( <i>SD</i> ) | 92.64<br>(11.25)       | 83.15<br>(10.25)        | 88.50<br>(12.47)        | 75.98<br>(9.61)             | 218           | 29.27    | < .001   | .287                  | TD = DYS > SLI+DYS,<br>DYS = SLI,<br>TD > SLI > SLI+DYS |
| PPVT-4<br><i>M</i> ( <i>SD</i> )  | 106.64<br>(10.77)      | 94.13<br>(8.042)        | 104.87<br>(8.76)        | 91.76<br>(9.02)             | 217           | 37.02    | < .001   | .339                  | TD = DYS > SLI = SLI+DYS                                |
| EVT-2<br><i>M</i> ( <i>SD</i> )   | 105.88<br>(8.71)       | 93.17<br>(7.29)         | 101.07<br>(6.19)        | 87.75<br>(8.55)             | 218           | 65.90    | < .001   | .476                  | TD > DYS > SLI > SLI+DYS                                |

<sup>a</sup> Sample size differed on the PPVT-4 (*n* = 85).

<sup>b</sup> Sample sizes differed on the CTOPP-2, PPVT-4, and EVT-2 (*n* = 59).

Note. A series of one-way ANOVAs were estimated to examine group differences on the subgrouping and descriptive assessments. Pairwise comparisons using Tukey’s HSD were applied to maintain an experiment-wise Type I error rate of .05 for each model.

B. One-way ANOVA summary table examining group differences for the primary outcome for each word learning task using SLI criteria.

---

**Naming**

---

| Source | Sum of Squares | <i>df</i> | Mean Square | <i>F</i> | <i>p</i> -value | <i>R</i> <sup>2</sup> |
|--------|----------------|-----------|-------------|----------|-----------------|-----------------------|
| Group  | 25.00          | 3         | 8.33        | 5.61     | .001            | .071                  |
| Error  | 325.18         | 219       | 1.49        |          |                 |                       |

---

**Listening**

---

| Source | Sum of Squares | <i>df</i> | Mean Square | <i>F</i> | <i>p</i> -value | <i>R</i> <sup>2</sup> |
|--------|----------------|-----------|-------------|----------|-----------------|-----------------------|
| Group  | 179.57         | 3         | 59.86       | 22.07    | < .0001         | .232                  |
| Error  | 593.93         | 219       | 2.71        |          |                 |                       |

---

**Drawing**

---

| Source | Sum of Squares | <i>df</i> | Mean Square | <i>F</i> | <i>p</i> -value | <i>R</i> <sup>2</sup> |
|--------|----------------|-----------|-------------|----------|-----------------|-----------------------|
| Group  | 181.07         | 3         | 60.36       | 16.98    | < .0001         | .189                  |
| Error  | 778.37         | 219       | 3.55        |          |                 |                       |

---

**Describing\***

---

| Source | Sum of Squares | <i>df</i> | Mean Square | <i>F</i> | <i>p</i> -value | <i>R</i> <sup>2</sup> |
|--------|----------------|-----------|-------------|----------|-----------------|-----------------------|
| Group  | 795.41         | 3         | 265.14      | 11.35    | < .0001         | .146                  |
| Error  | 4642.34        | 98.6      | 21.20       |          |                 |                       |

---

**Finding**

---

| Source | Sum of Squares | <i>df</i> | Mean Square | <i>F</i> | <i>p</i> -value | <i>R</i> <sup>2</sup> |
|--------|----------------|-----------|-------------|----------|-----------------|-----------------------|
| Group  | 161.70         | 3         | 53.90       | 12.19    | < .0001         | .143                  |
| Error  | 968.28         | 219       | 4.42        |          |                 |                       |

---

\*Results are from Welch’s ANOVA to account for unequal group variances.

C. Primary accuracy scores of word learning tasks by group using SLI criteria; Effect size and significance of pairwise comparisons.

| Task                                 | Group Descriptives     |                         |                         |                             | Effect Size (Hedge's <i>g</i> ) and Significance of Pairwise Comparisons |               |                   |                |                    |                    |
|--------------------------------------|------------------------|-------------------------|-------------------------|-----------------------------|--------------------------------------------------------------------------|---------------|-------------------|----------------|--------------------|--------------------|
|                                      | TD<br>( <i>n</i> = 86) | SLI<br>( <i>n</i> = 47) | DYS<br>( <i>n</i> = 30) | SLI+DYS<br>( <i>n</i> = 60) | TD vs.<br>SLI                                                            | TD vs.<br>DYS | TD vs.<br>SLI+DYS | SLI vs.<br>DYS | SLI vs.<br>SLI+DYS | DYS vs.<br>SLI+DYS |
| Naming<br><i>M</i> ( <i>SD</i> )     | 1.53 (1.35)            | 1.17 (1.36)             | 0.63 (0.72)             | 0.88 (1.09)                 | 0.266                                                                    | 0.737 *       | 0.517 *           | 0.468          | 0.236              | -0.258             |
| Listening<br><i>M</i> ( <i>SD</i> )  | 5.47 (1.56)            | 4.74 (1.81)             | 4.07 (1.48)             | 3.27 (1.71)                 | 0.442                                                                    | 0.908 *       | 1.359 *           | 0.396          | 0.841 *            | 0.491              |
| Drawing<br><i>M</i> ( <i>SD</i> )    | 4.26 (1.97)            | 3.64 (2.07)             | 2.63 (1.79)             | 2.12 (1.65)                 | 0.309                                                                    | 0.846 *       | 1.162 *           | 0.514          | 0.826 *            | 0.303              |
| Describing<br><i>M</i> ( <i>SD</i> ) | 9.70 (5.44)            | 6.89 (3.66)             | 7.00 (4.23)             | 5.07 (4.10)                 | 0.575 *                                                                  | 0.523 *       | 0.939 *           | -0.028         | 0.466              | 0.466              |
| Finding<br><i>M</i> ( <i>SD</i> )    | 5.90 (1.92)            | 5.23 (2.33)             | 4.07 (2.16)             | 3.97 (2.13)                 | 0.323                                                                    | 0.922 *       | 0.962 *           | 0.512          | 0.569 *            | 0.048              |

*Note.* Pairwise comparisons used Tukey’s HSD to maintain an experiment-wise Type I error rate of .05 for each model. Asterisks indicate a comparison is significant at the .05 level. TD = typical development, SLI = Specific Language Impairment, DYS = Dyslexia.
